# Supplementary material
Source: publisher figshare collection journal article supplement (https://acs.figshare.com/ndownloader/files/4081438)
Supplement: Supplementary file 1 [file 4081438]

## Supporting Information

### Nardoaristolones A and B, Two Terpenoids with Unusual Skeletons from *Nardostachys chinensis* Batal

Ming-Li Liu, Ying-Hui Duan, Yun-Long Hou, Chang Li, Hao Gao, Yi Dai,<sup>\*</sup> and  
Xin-Sheng Yao<sup>\*</sup>

*Institute of Traditional Chinese Medicine & Natural Products,*

*Jinan University, Guangzhou, 510632, P. R. China*

*Guangdong Province Key Laboratory of Pharmacodynamic Constituents of*

*TCM and New Drugs Research, Jinan University, Guangzhou, 510632, P. R. China*

*College of Traditional Chinese Materia Medica,*

*Shenyang Pharmaceutical University, Shenyang, 110016, P. R. China*

*State-Province Key Laboratory of Biomedicine-Pharmaceutics of China, Department*

*of Pharmacology, Harbin Medical University, Harbin, 150086, P. R. China*

Corresponding author: Tel.: +86 20 8522 5849; fax: +86 20 8522 1559

E-mail address: tyaoxs@jnu.edu.cn; daiyi1004@163.com

## List of Supporting Information

|                                                                                           |       |
|-------------------------------------------------------------------------------------------|-------|
| 1. General experimental procedures.....                                                   | 3     |
| 2. Plant material .....                                                                   | 3     |
| 3. Extraction and isolation of <b>1-2</b> .....                                           | 3     |
| 4. Physico-chemical constants of <b>1-2</b> .....                                         | 3     |
| 5. Spectral information of <b>1</b> .....                                                 | 4-12  |
| 5.1. UV spectrum of <b>1</b> in CH <sub>3</sub> OH .....                                  | 4     |
| 5.2. IR (KBr disc) spectrum of <b>1</b> .....                                             | 4     |
| 5.3. HR-ESI-MS spectrum of <b>1</b> .....                                                 | 5     |
| 5.4. 1D and 2D NMR spectra of <b>1</b> in CDCl <sub>3</sub> .....                         | 6-12  |
| 5.4.1 <sup>1</sup> H NMR spectrum of <b>1</b> in CDCl <sub>3</sub> .....                  | 6     |
| 5.4.2 <sup>13</sup> C NMR spectrum of <b>1</b> in CDCl <sub>3</sub> .....                 | 7     |
| 5.4.3 HSQC spectrum of <b>1</b> in CDCl <sub>3</sub> .....                                | 8     |
| 5.4.4 <sup>1</sup> H- <sup>1</sup> H COSY spectrum of <b>1</b> in CDCl <sub>3</sub> ..... | 9     |
| 5.4.5 HMBC spectrum of <b>1</b> in CDCl <sub>3</sub> .....                                | 10    |
| 5.4.6 ROESY spectrum of <b>1</b> in CDCl <sub>3</sub> .....                               | 11    |
| 5.4.7 Enlarged ROESY spectrum of <b>1</b> in CDCl <sub>3</sub> .....                      | 12    |
| 6. Spectral information of <b>2</b> .....                                                 | 13-21 |
| 6.1. UV spectrum of <b>2</b> in CH <sub>3</sub> OH .....                                  | 13    |
| 6.2. IR (KBr disc) spectrum of <b>2</b> .....                                             | 13    |
| 6.3. HR-ESI-MS spectrum of <b>2</b> .....                                                 | 14    |
| 6.4. 1D and 2D NMR spectra of <b>2</b> in CDCl <sub>3</sub> .....                         | 15-20 |
| 6.4.1 <sup>1</sup> H NMR spectrum of <b>2</b> in CDCl <sub>3</sub> .....                  | 15    |
| 6.4.2 <sup>13</sup> C NMR spectrum of <b>2</b> in CDCl <sub>3</sub> .....                 | 16    |
| 6.4.3 HSQC spectrum of <b>2</b> in CDCl <sub>3</sub> .....                                | 17    |
| 6.4.4 <sup>1</sup> H- <sup>1</sup> H COSY spectrum of <b>2</b> in CDCl <sub>3</sub> ..... | 18    |
| 6.4.5 HMBC spectrum of <b>2</b> in CDCl <sub>3</sub> .....                                | 19    |
| 6.4.6 NOESY spectrum of <b>2</b> in CDCl <sub>3</sub> .....                               | 20    |
| 7. Bioassays.....                                                                         | 21    |

### General experimental procedures

Optical rotations were measured on a Jasco P-1020 polarimeter with a 1 cm cell at room temperature. UV spectra were recorded on a JASCO V-550 UV/Vis spectrometer. IR spectra were obtained using a JASCO FT/IR-480 plus spectrometer. CD spectra were obtained on a Jasco J-810 spectropolarimeter at room temperature. HR-ESI-MS spectra were acquired using a Waters Synapt G2 mass spectrometer. The NMR spectra were measured with a Bruker AV-300/400/600 spectrometer at room temperature. Silica gel (200-300 mesh, Qingdao Marine Chemical Ltd., China), octadecylsilanized (ODS) silica gel (YMC Ltd., Japan), and Sephadex LH-20 (Amersham Pharmacia Biotech, Sweden) were used for open column chromatography (CC).

### Plant Material

The underground parts of *Nardostachys chinensis* were provided by Shijiazhuang Yiling Pharmaceutical Co., Ltd and identified by Dr. Qingcun Tian of the company.

### Extraction and Isolation

The air-dried medical materials (5 Kg) were refluxed twice with 60% EtOH for 2 hours each time. The crude extract (970.5g) was column chromatographed over a macroporous resin HP-20 eluted with EtOH-H<sub>2</sub>O in gradient. The 70% EtOH-H<sub>2</sub>O eluent (171.7 g) was fractionated by silica gel column chromatography eluted with CHCl<sub>3</sub>-CH<sub>3</sub>OH (100:0→0:100) to afford twelve fractions (Fr. 1-12). Fr. 3 (53.4 g, CHCl<sub>3</sub>/CH<sub>3</sub>OH 99:1) was then chromatographed on a silica gel column using petroleum ether-EtOAc gradient elution to yield 9 subfractions (Fr. 3.1-3.9). The subfraction Fr. 3.8 (9.1 g, P/E 100:10) was further subjected to ODS column chromatography eluted with MeOH-H<sub>2</sub>O (50:50→100:0) and purified by preparative HPLC on ODS column with 45% MeOH-H<sub>2</sub>O to yield compound **2** (89.2 mg). Another subfraction Fr. 3.9 (2.1 g, P/E 100:15) was also subjected to ODS column chromatography eluted with MeOH-H<sub>2</sub>O (50:50→100:0) and purified by Sephadex LH-20 column chromatography (CHCl<sub>3</sub>/CH<sub>3</sub>OH 7:3) to afford compound **1** (5.6 mg).

### Physico-chemical constants of 1-2

Nardoaristolone A (**1**): Yellow powder;  $[\alpha]_D^{26}$  -74.6 (*c* 0.50, CH<sub>3</sub>OH); UV (CH<sub>3</sub>OH)  $\lambda_{\max}$  (log  $\epsilon$ ) 204.6 (3.87), 295.4 (3.44), 365.8 (3.63) nm; IR (KBr)  $\lambda_{\max}$  3140, 2361, 1630, 1515, 1401, 1250, 1165, 829 cm<sup>-1</sup>; CD (CH<sub>3</sub>OH)  $\lambda_{\max}$  ( $\Delta\epsilon$ ) 395 (+2.35), 318 (-2.61), 268 (-1.40), 235 (+0.41), 215 (-1.12) nm; HR-ESI-MS *m/z* 531.2380 ([M+H]<sup>+</sup>, calcd for C<sub>32</sub>H<sub>35</sub>O<sub>7</sub>, 531.2383).

Nardoaristolone B (**2**): Light yellow crystals;  $[\alpha]_D^{26}$  -19.6 (*c* 0.50, CH<sub>3</sub>OH); UV (CH<sub>3</sub>OH)  $\lambda_{\max}$  (log  $\epsilon$ ) 254.2 (3.66) nm; IR (KBr)  $\lambda_{\max}$  1704, 1671, 1454, 1370, 1214, 1033, 869 cm<sup>-1</sup>; CD (CH<sub>3</sub>OH)  $\lambda_{\max}$  ( $\Delta\epsilon$ ) 398 (+1.11), 336 (-1.78), 269 (-2.54), 230 (+4.53), 214 (+4.10) nm; HR-ESI-MS *m/z* 219.1377 ([M+H]<sup>+</sup>, calcd for C<sub>14</sub>H<sub>19</sub>O<sub>2</sub>, 219.1385).

UV spectrum of nardoaristolone A (1) in CH<sub>3</sub>OH.

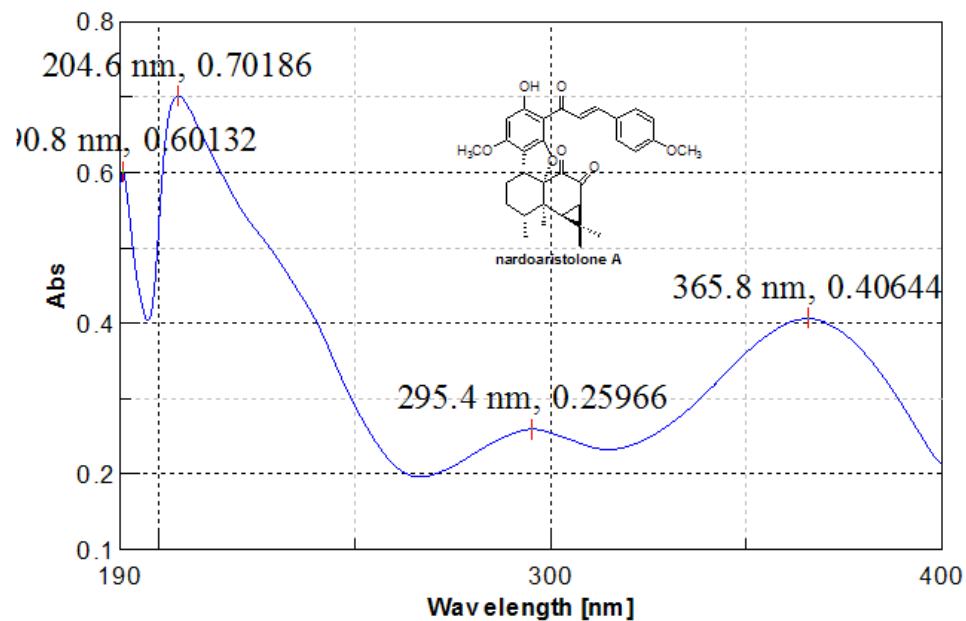

IR (KBr disc) spectrum of nardoaristolone A (1).

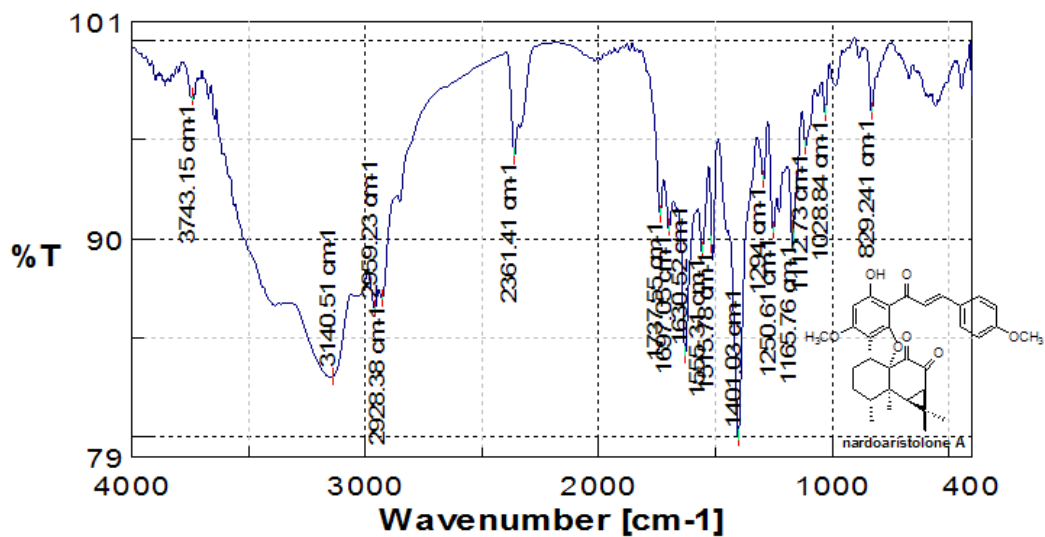

# HR-ESI-MS spectrum of nardoaristolone A (1).

## Elemental Composition Report

Page 1

### Single Mass Analysis

Tolerance = 5.0 PPM / DBE: min = -1.5, max = 50.0

Element prediction: Off

Number of isotope peaks used for i-FIT = 3

Monoisotopic Mass, Even Electron Ions

146 formula(e) evaluated with 1 results within limits (up to 50 best isotopic matches for each mass)

Elements Used:

C: 0-200 H: 0-1000 O: 0-200

E3-g-18-2

20120528-08 247 (1.993) Cm (247)

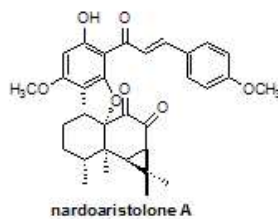

1: TOF MS ES+  
2.32e+005

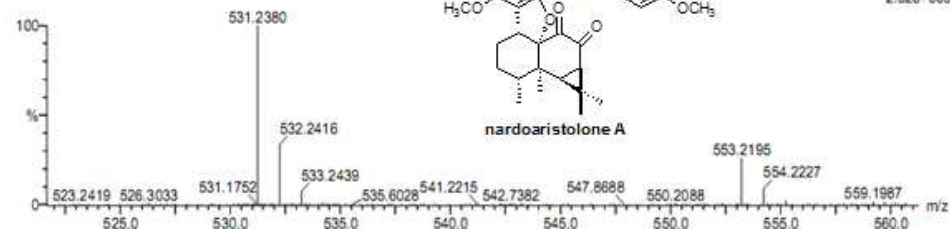

Minimum: -1.5  
Maximum: 5.0 5.0 50.0

| Mass     | Calc. Mass | Δ    | PPM  | DBE  | i-FIT | Norm | Conf(%) | Formula    |
|----------|------------|------|------|------|-------|------|---------|------------|
| 531.2380 | 531.2383   | -0.3 | -0.6 | 15.5 | 246.2 | n/a  | n/a     | C32 H35 O7 |

$^1\text{H}$  NMR (AV-300, 300 MHz) spectrum of nardoaristolone A (1) in  $\text{CDCl}_3$

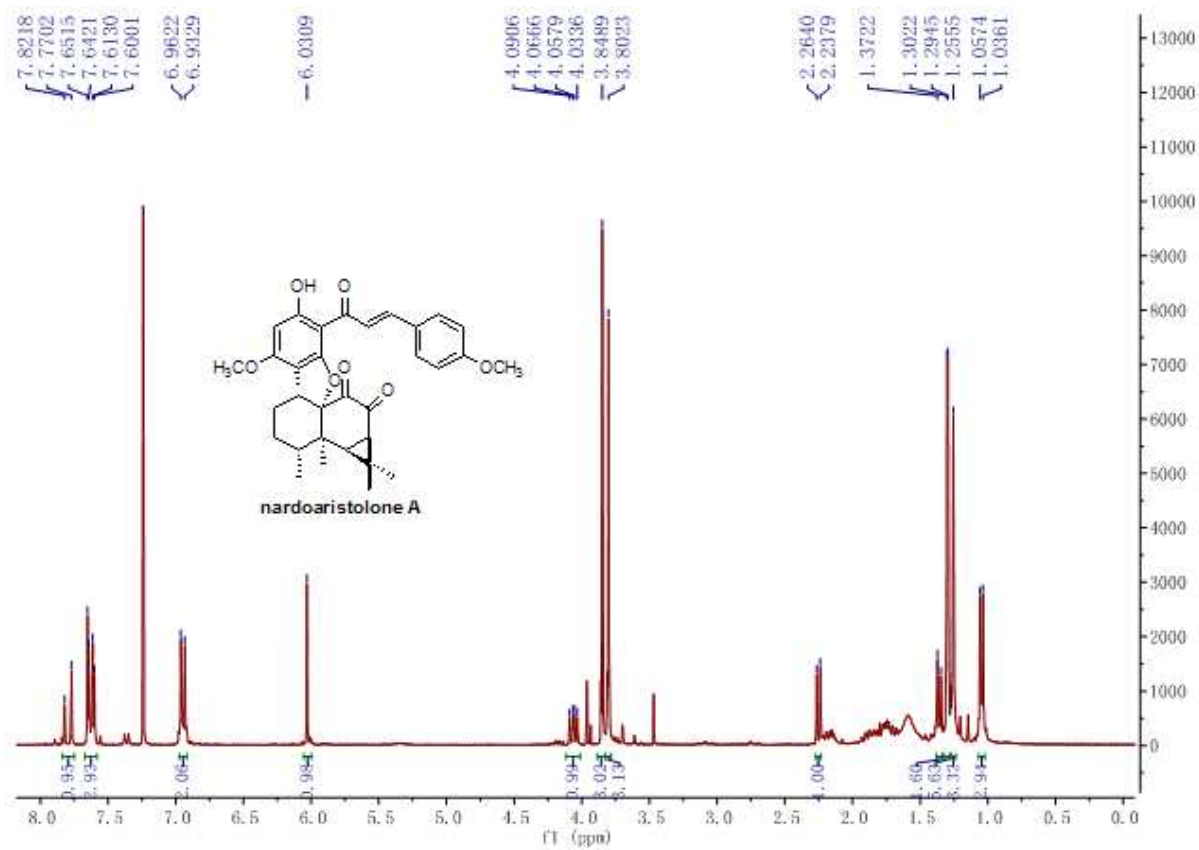

$^{13}\text{C}$  NMR spectrum (AV-400, 100 MHz) of nardoaristolone A (1) in  $\text{CDCl}_3$

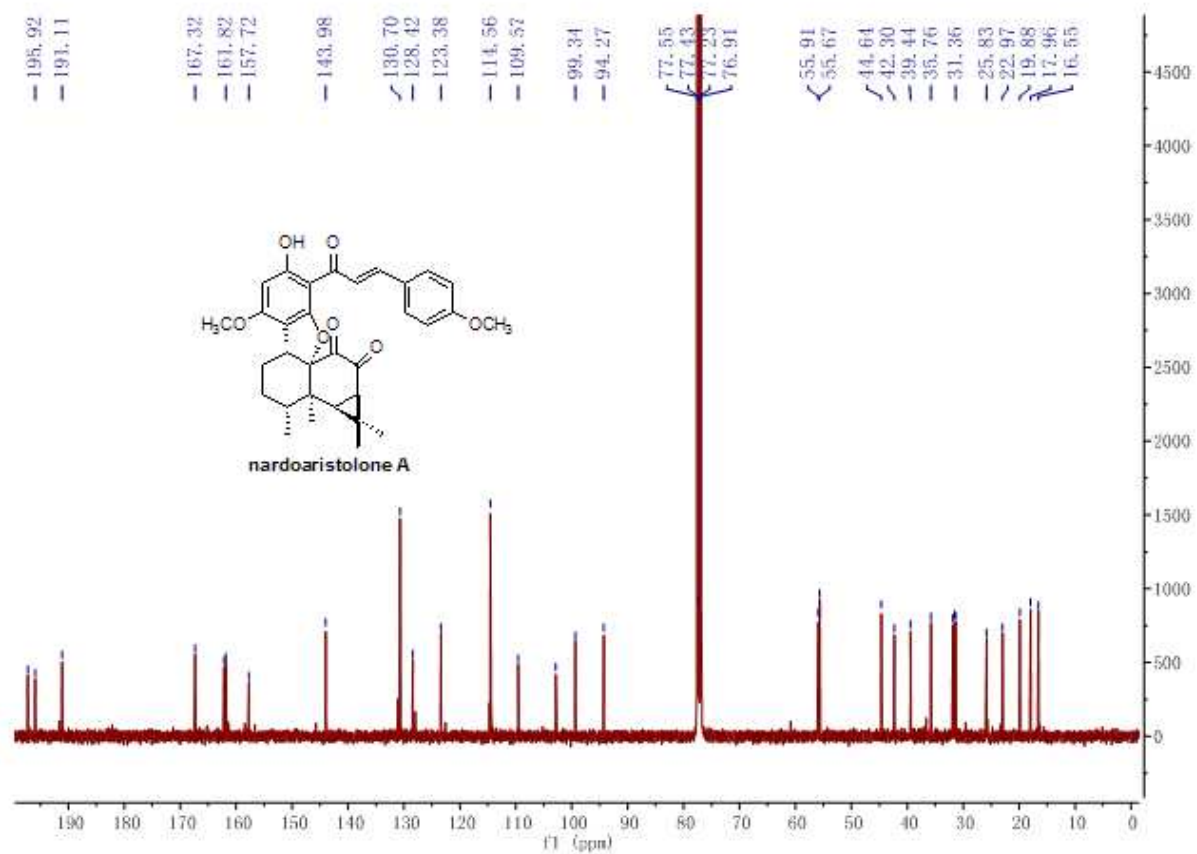

**HSQC spectrum (AV-400) of nardoaristolone A (1)1 in CDCl<sub>3</sub>**

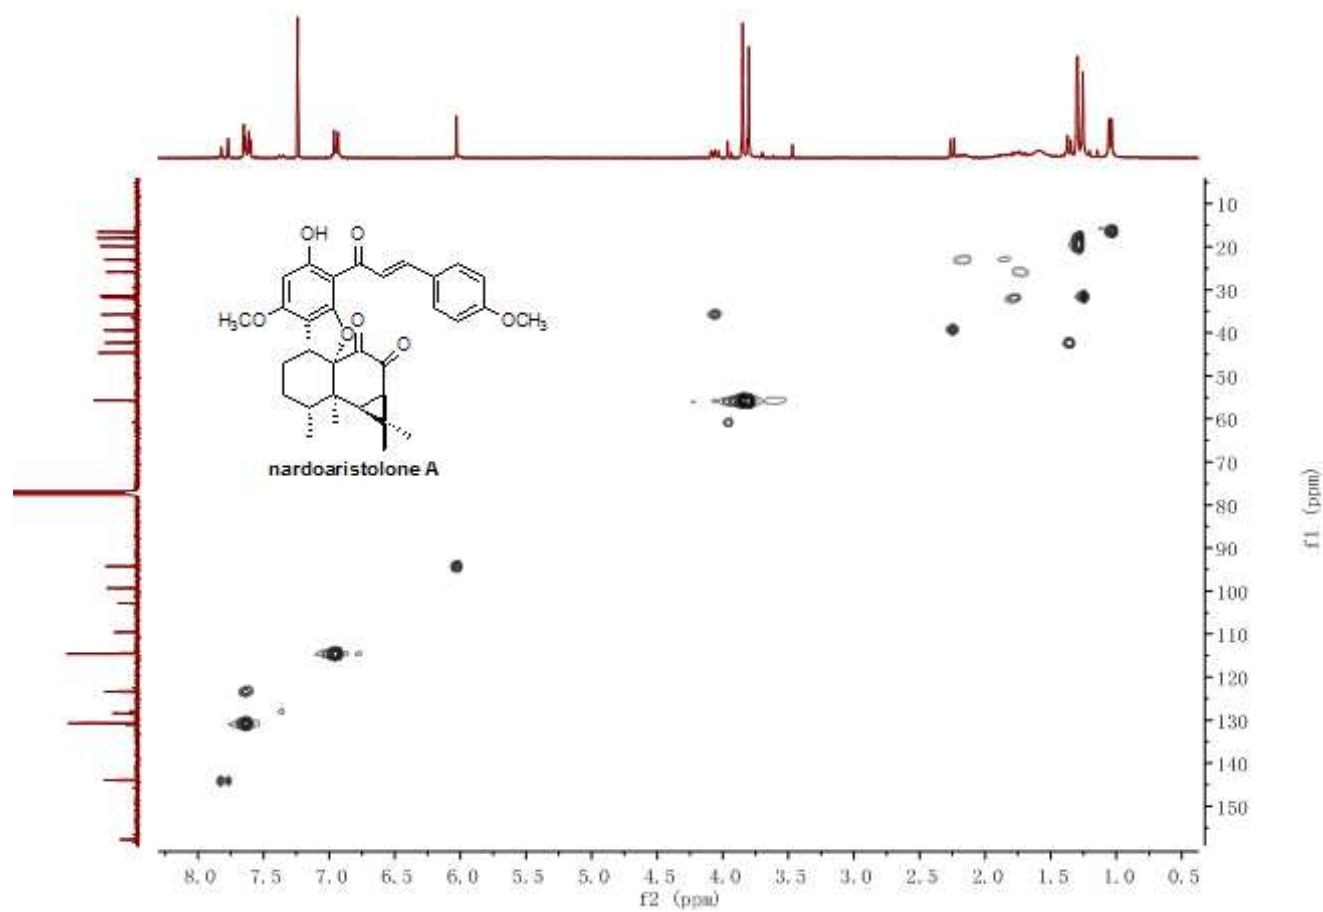



$^1\text{H}$ - $^1\text{H}$  COSY spectrum (AV-400) of nardoaristolone A (1) in  $\text{CDCl}_3$

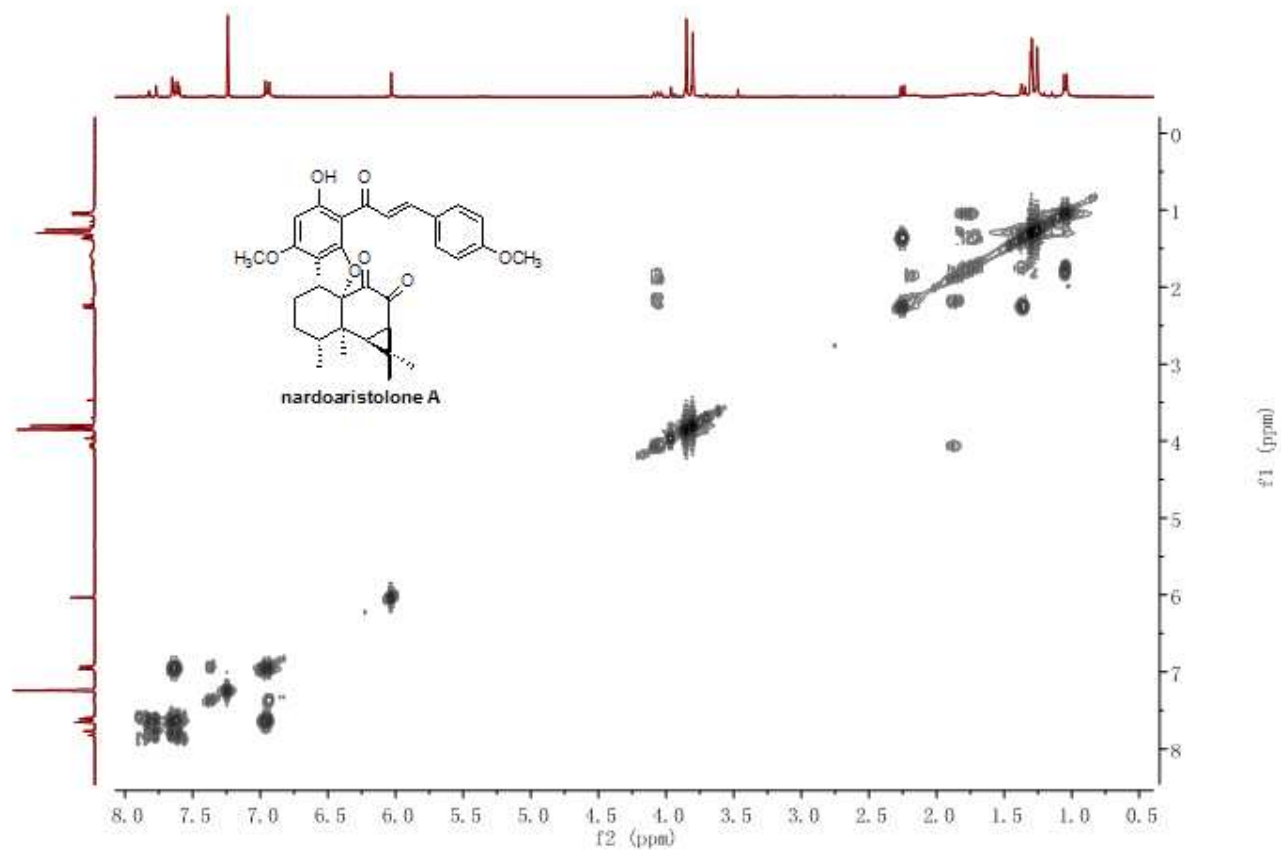

HMBC spectrum (AV-400) of nardoaristolone A (1) in CDCl<sub>3</sub>

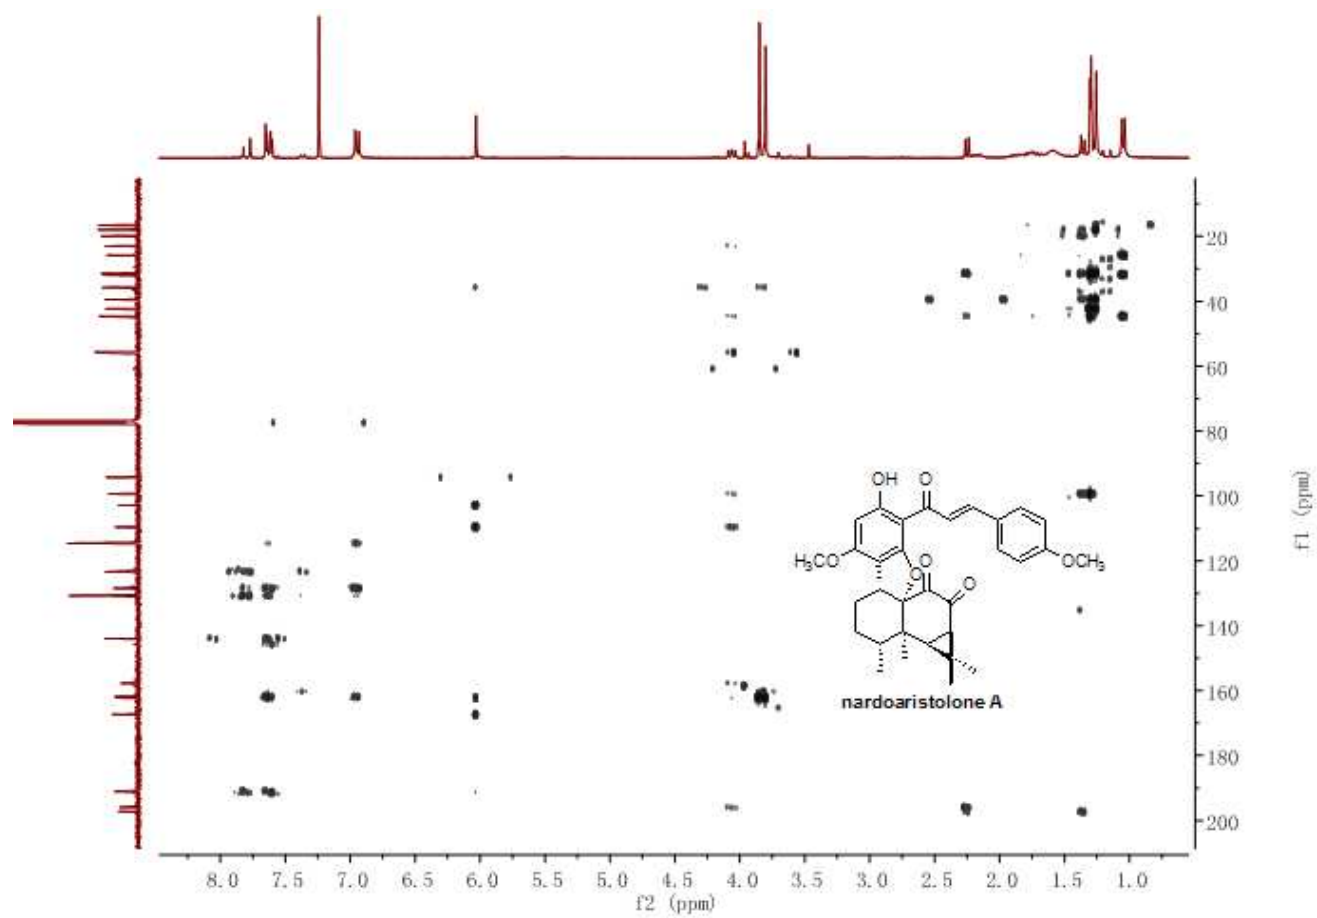

ROESY spectrum (AV-400) of nardoaristolone A (1) in CDCl<sub>3</sub>

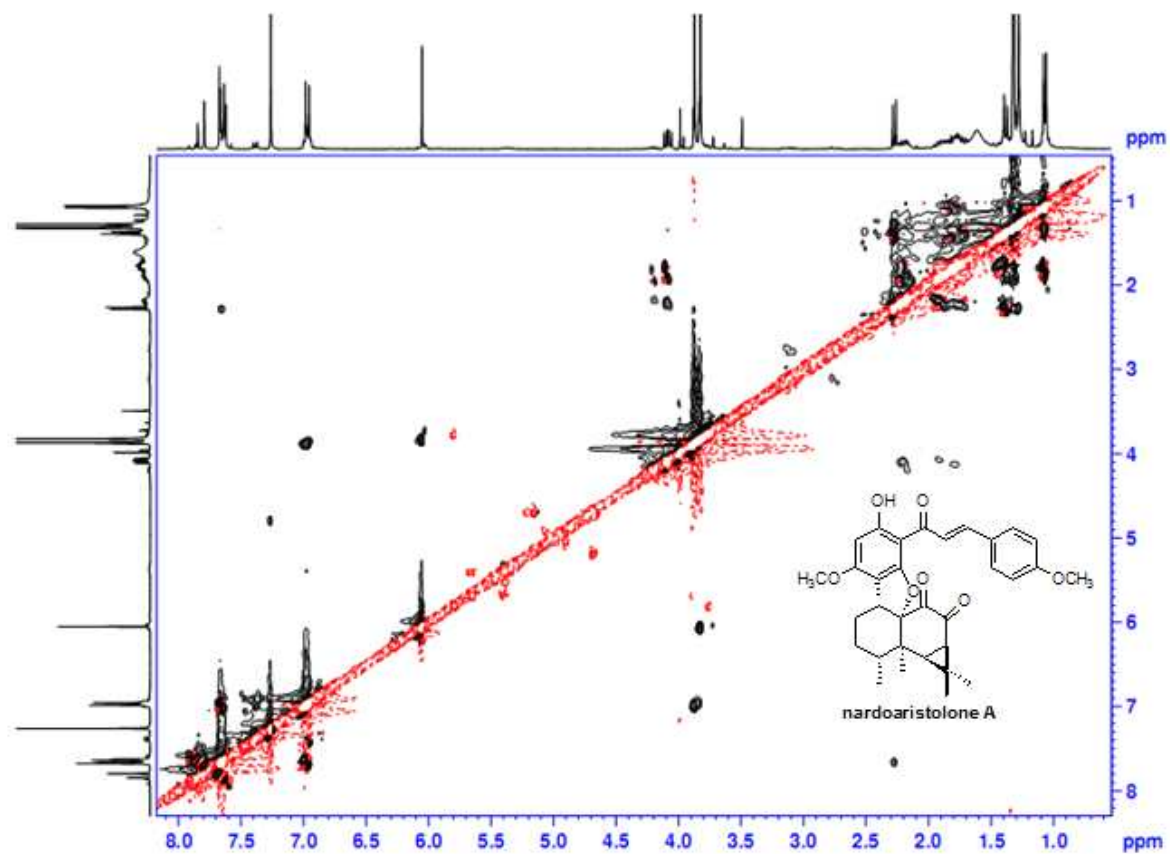

Enlarged ROESY spectrum (AV-400) of nardoaristolone A (1) in CDCl<sub>3</sub>

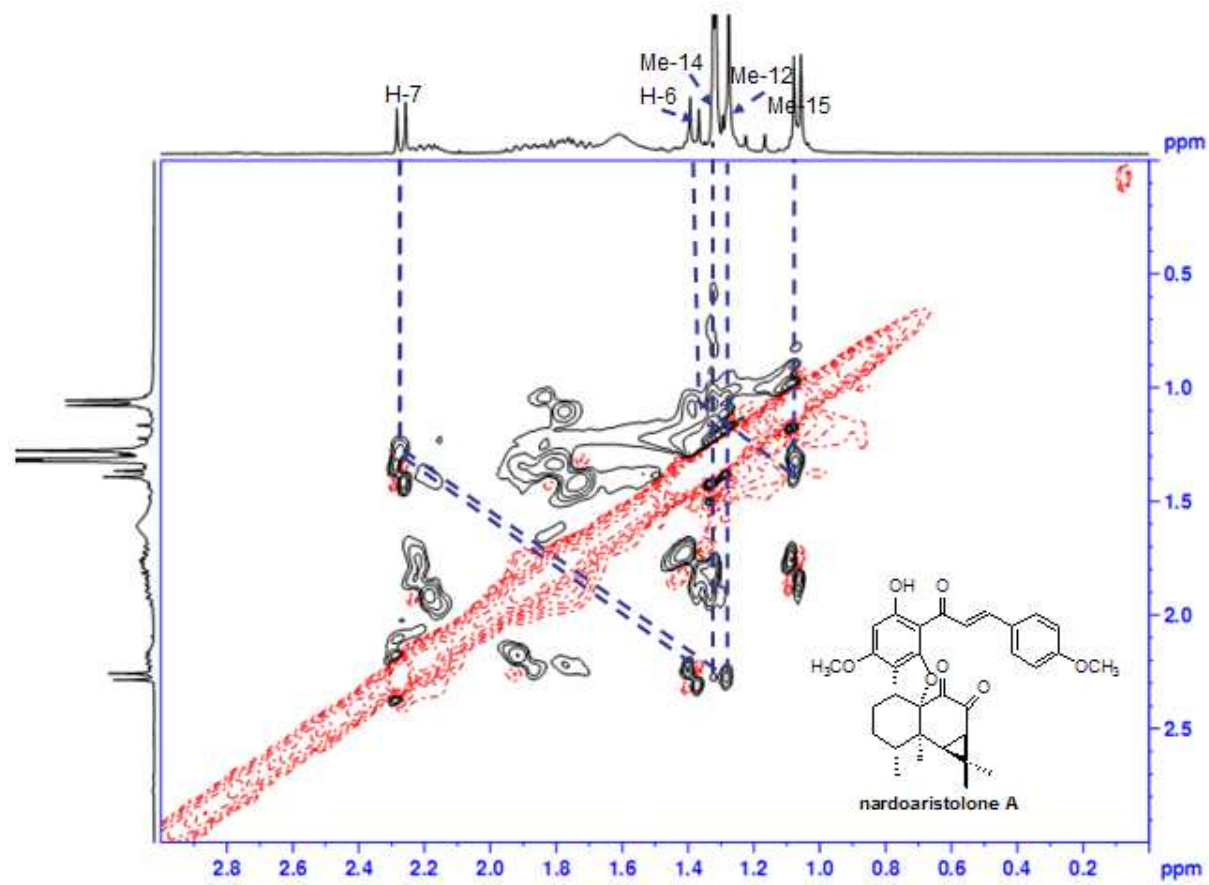

UV spectrum of nardoaristolone B (2) in CH<sub>3</sub>OH.

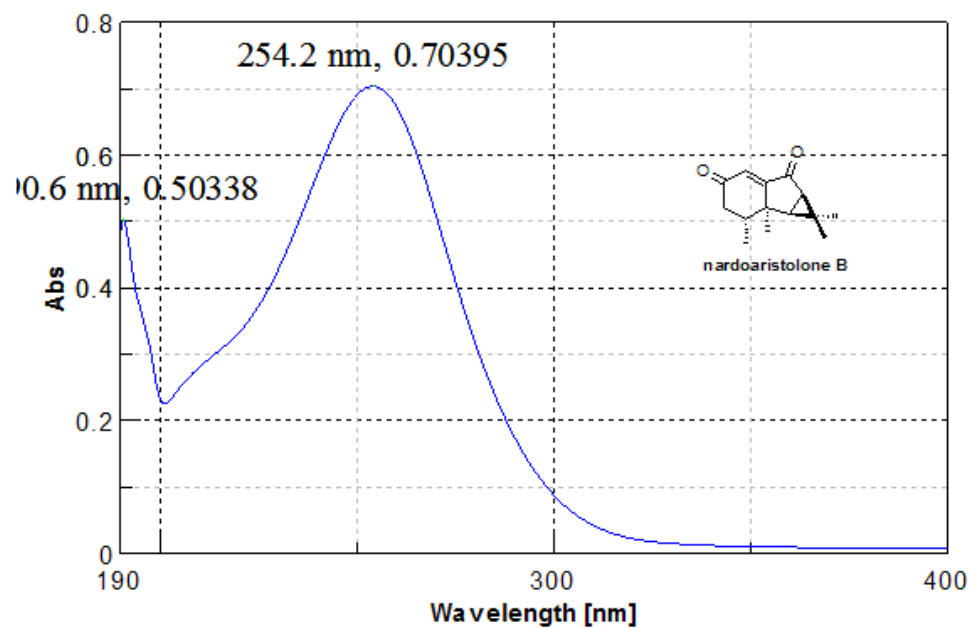

IR (KBr disc) spectrum of nardoaristolone B (2).

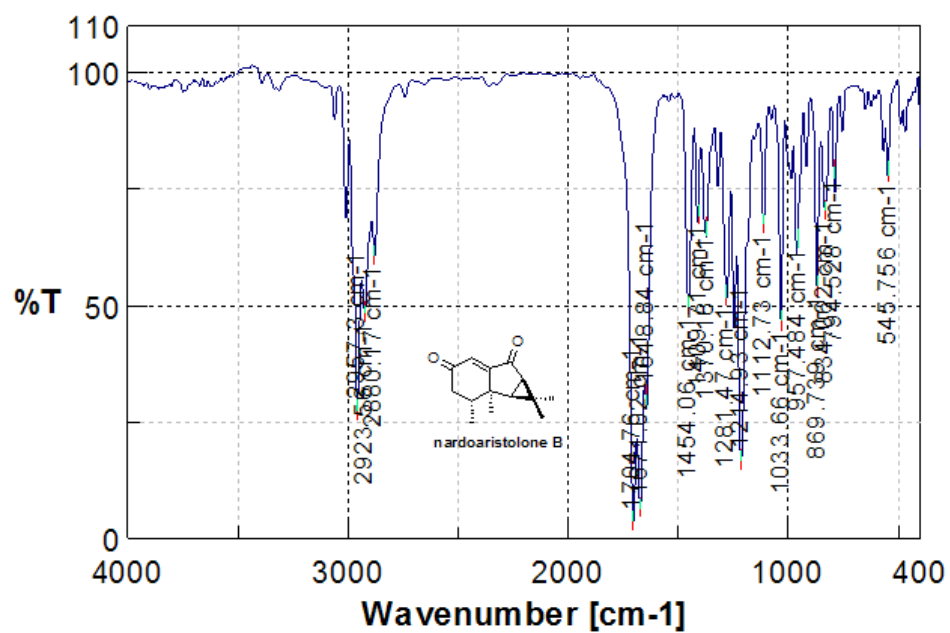

## HR-ESI-MS spectrum of nardoaristolone B (2).

### Elemental Composition Report

Page 1

#### Single Mass Analysis

Tolerance = 5.0 PPM / DBE: min = -1.5, max = 50.0

Element prediction: Off

Number of isotope peaks used for i-FIT = 3

Monoisotopic Mass, Even Electron Ions

63 formula(e) evaluated with 1 results within limits (up to 50 best isotopic matches for each mass)

Elements Used:

C: 0-200 H: 0-1000 O: 0-200 Na: 0-1

E3-BB-2A4

20120612-20 154 (1.253) Cm (154)

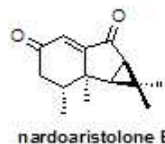

1: TOF MS ES+  
1.36e+004

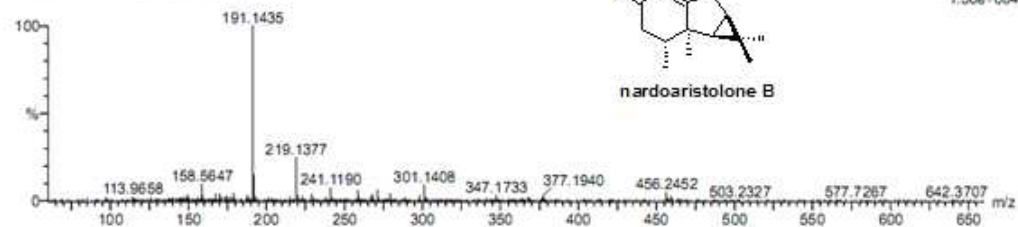

Minimum: 5.0 5.0 -1.5  
Maximum: 5.0 5.0 50.0

| Mass     | Calc. Mass | mDa  | PPM  | DBE | i-FIT | Norm | Conf(%) | Formula    |
|----------|------------|------|------|-----|-------|------|---------|------------|
| 219.1377 | 219.1385   | -0.8 | -3.7 | 5.5 | 41.8  | n/a  | n/a     | C14 H19 O2 |

$^1\text{H}$  NMR (AV-300, 300 MHz) spectrum of nardoaristolone B (2) in  $\text{CDCl}_3$

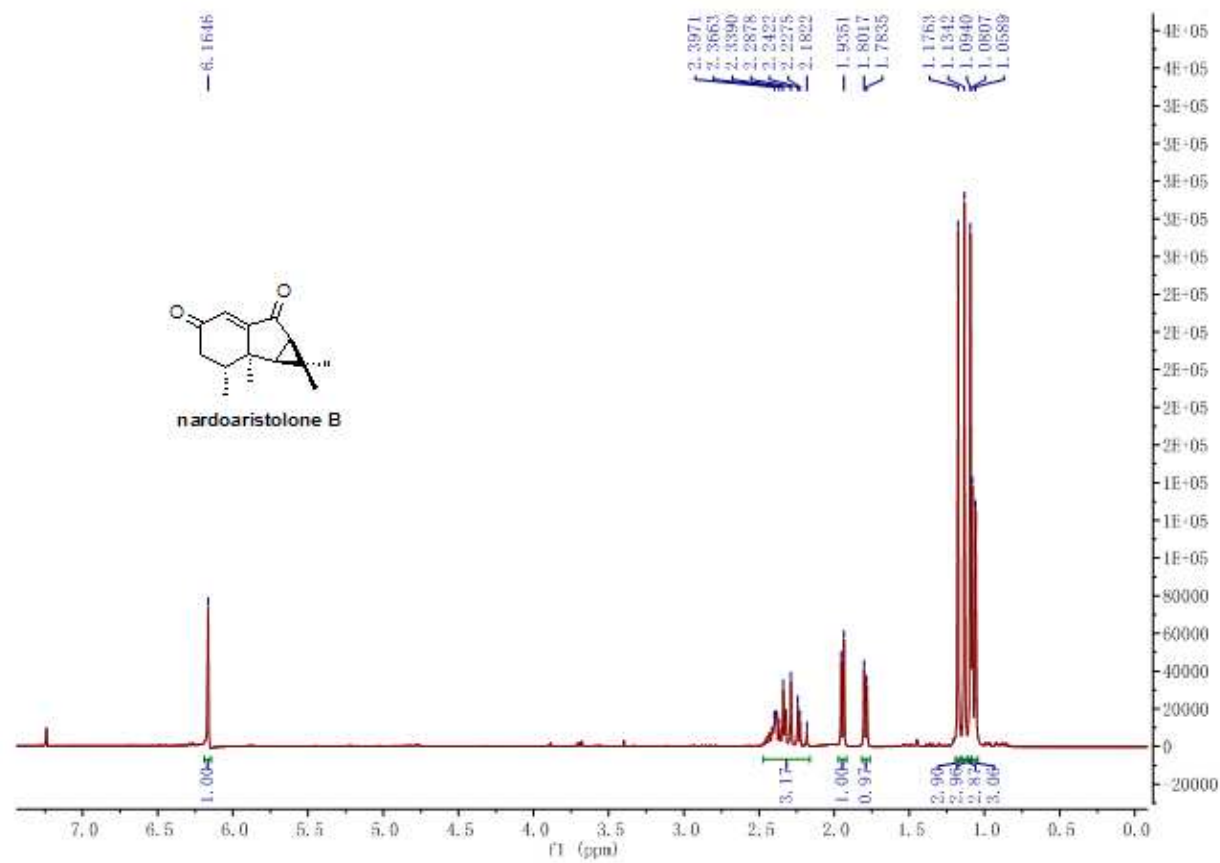

$^{13}\text{C}$  NMR spectrum (AV-300, 75 MHz) of nardoaristolone B (2) in  $\text{CDCl}_3$

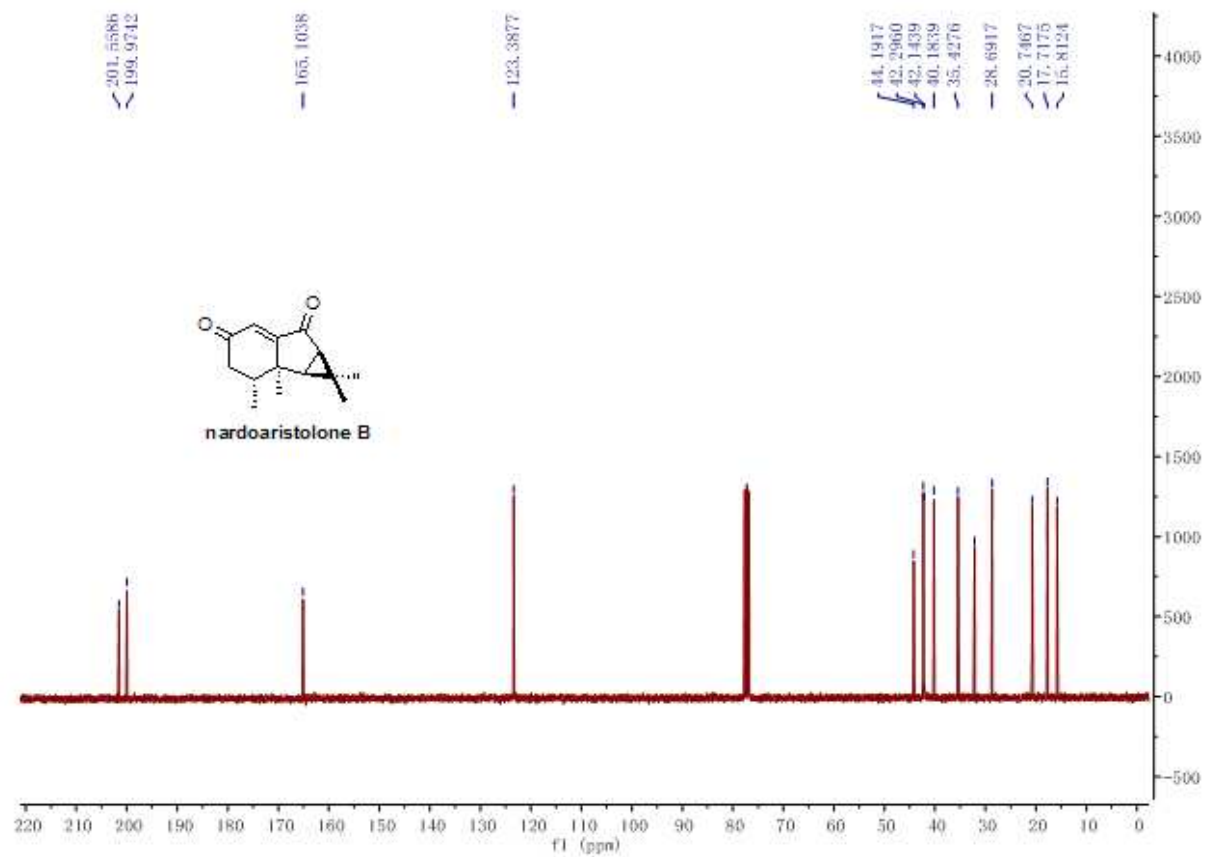



HSQC spectrum (AV-300) of nardoaristolone B (2)1 in CDCl<sub>3</sub>

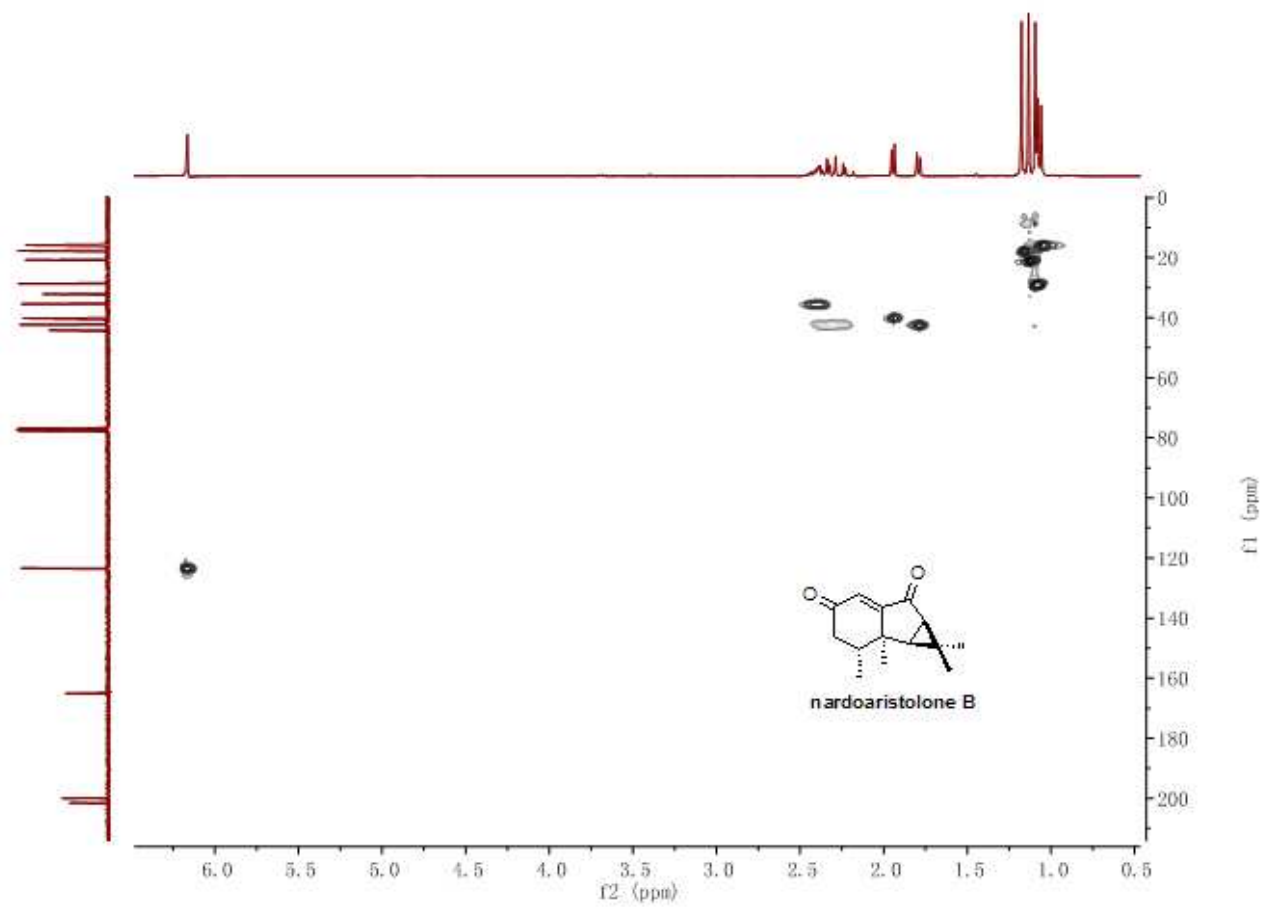

$^1\text{H}$ - $^1\text{H}$  COSY spectrum (AV-300) of nardoaristolone B (2) in  $\text{CDCl}_3$

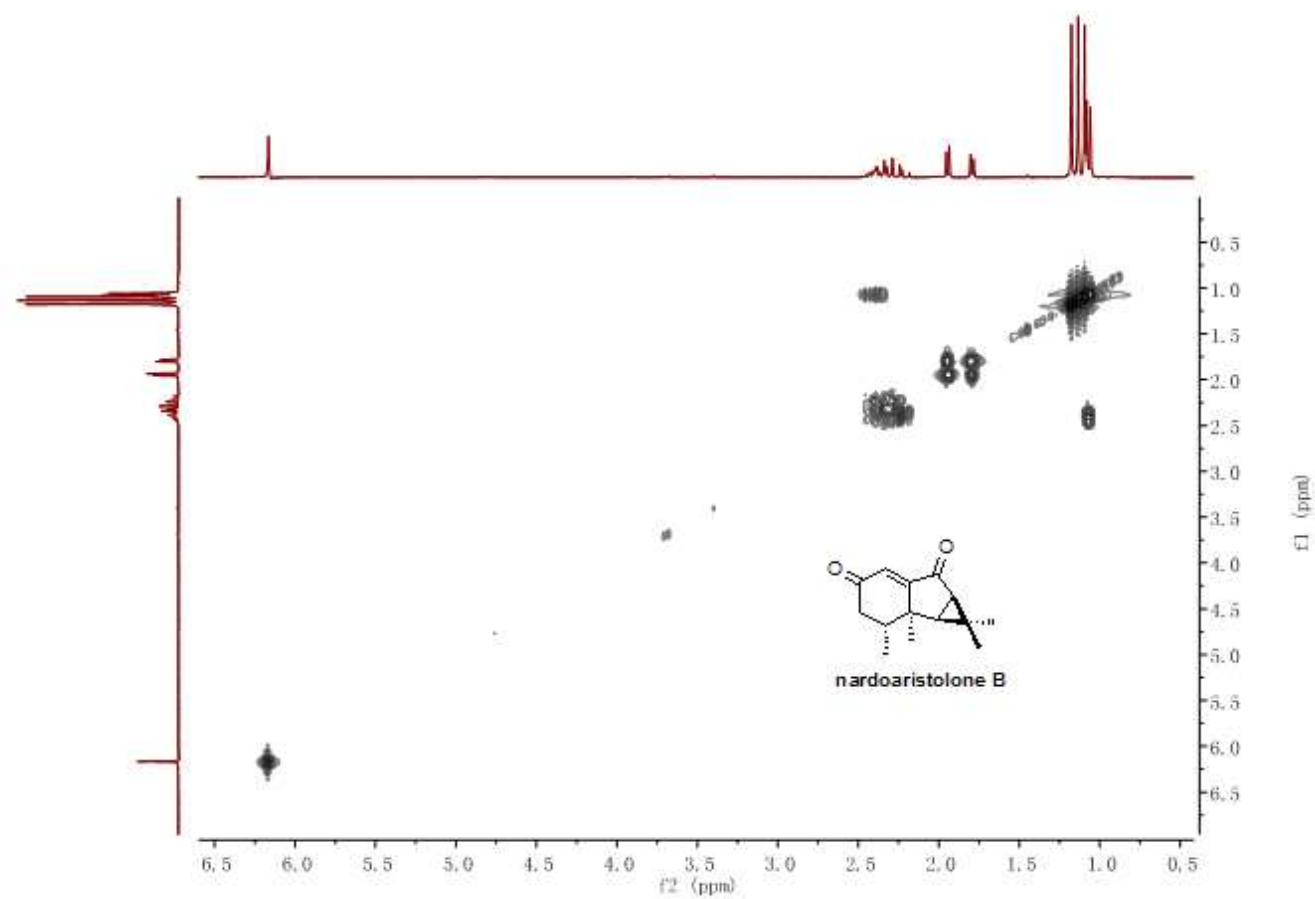

HMBC spectrum (AV-300) of nardoaristolone B (2) in CDCl<sub>3</sub>

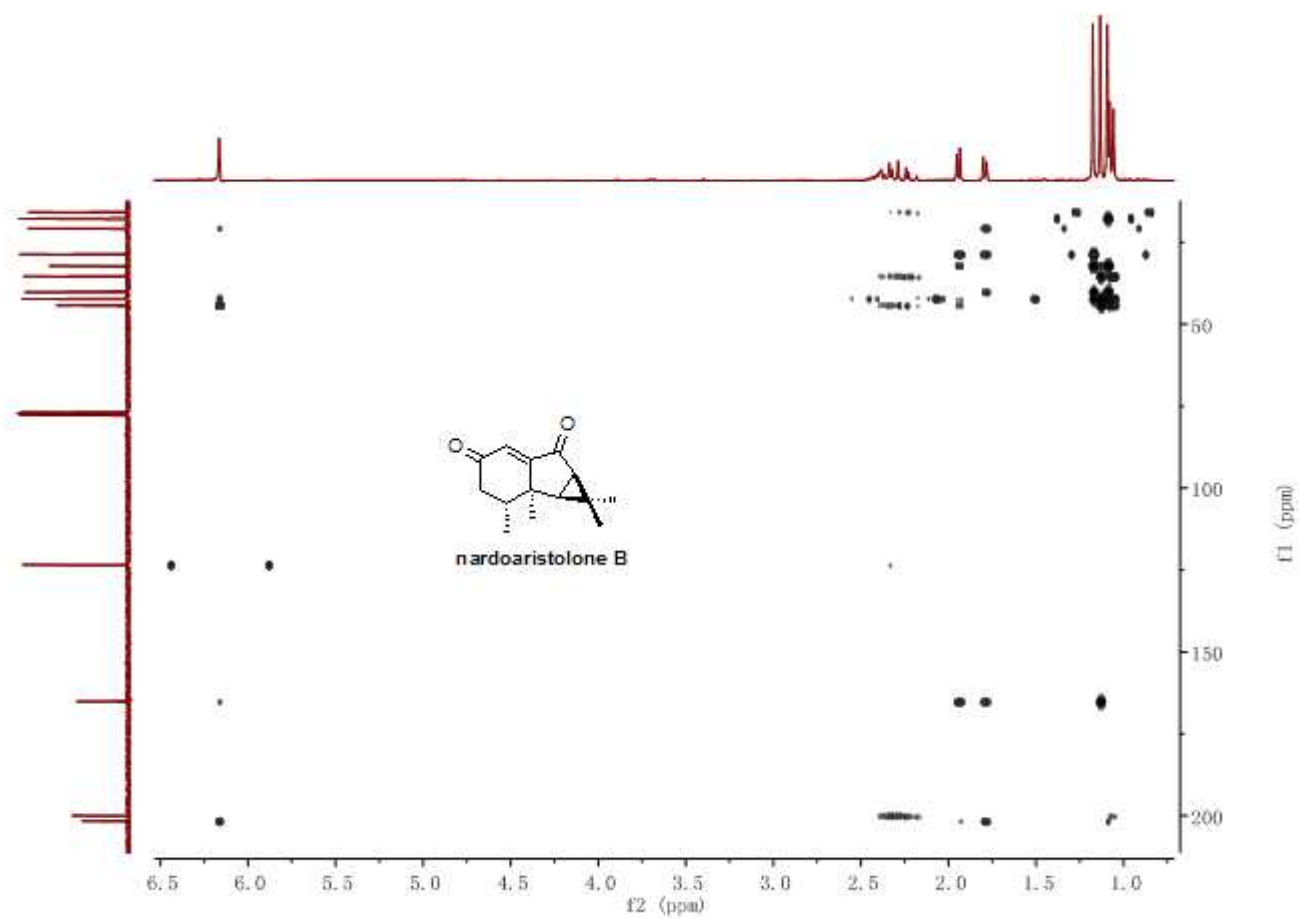

Enlarged NOESY spectrum (AV-600) of nardoaristolone B (2) in  $\text{CDCl}_3$

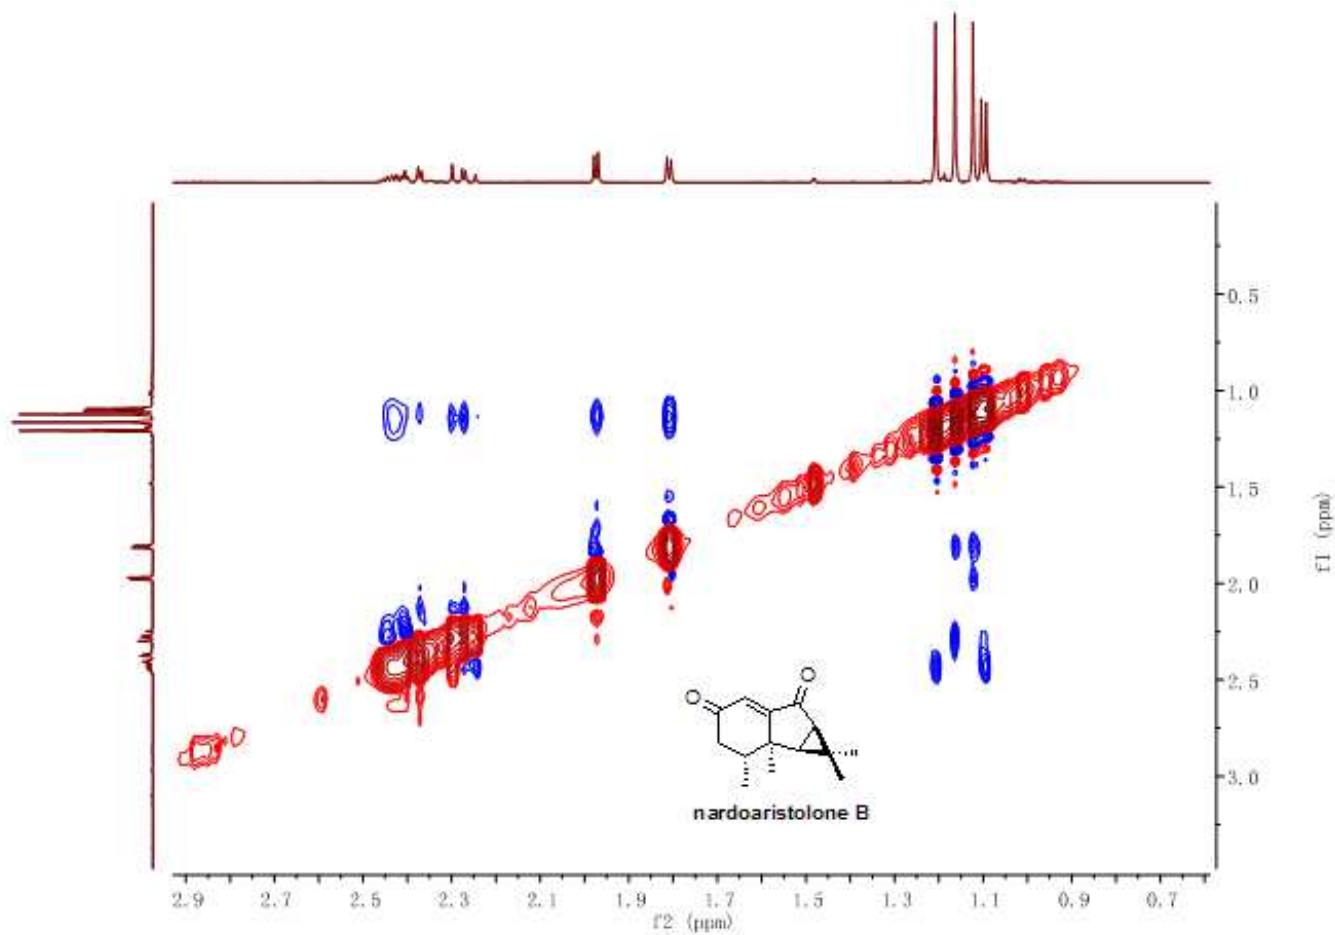

### Isolation and culture of cardiomyocytes

The neonatal rat cardiomyocytes were prepared from one to three-day-old Wistar rats by trypsin as described previously<sup>1,2</sup>. The ventricular myocardium was minced in DMEM (Dulbecco's Modified Eagle Medium, Hyclone, USA), which contains 25 mM D-glucose and 4 mM L-Glutamine. After the successive digestion with 0.25% trypsin, the cells were suspended in DMED containing 10% FBS (Fetal Bovine Serum, Hyclone, USA) and then centrifuged. Pooled cells were planted onto a 50 mL-cell culture bottle and incubated for 1.5-2 h at 37 °C in a humidified air with 5% CO<sub>2</sub>. The fibroblasts were depleted afterward with differential velocity adherent technique. Finally, the supernatant cells containing non-adherent cells were planted onto the 96-well plates at a density of 10<sup>5</sup> cells·cm<sup>-2</sup> with 0.1 mM bromodeoxyuridine (Sigma, USA), and incubated for 72 h at the same condition as described above.

### Experimental Classification

The cultured cells were divided into control, hydrogen peroxide (H<sub>2</sub>O<sub>2</sub>), compound 1, compound 2 and Salvianolic acid B groups. After starved in serum-free DMEM for 12 h, the cells were treated with 0.01, 0.1, 1, 10, 100 μM compound 1 for 12 h, respectively (as well as compound 2 and salvianolic acid B), then all groups were treated with DMEM containing 10% FBS and 100 μM H<sub>2</sub>O<sub>2</sub> for 3 h except control group.

### MTT assay for cell viability

[3-(4,5-dimethylthiazol-2-yl)-2,5-diphenyl tetrazolium bromide (MTT)] (Roche Molecular Biochemicals, Laval, PQ, Canada) was used to quantify the cell survival of each group. After 3 h H<sub>2</sub>O<sub>2</sub> injury, the supernatants of each well were replaced with 120 uL serum DMEM containing 20 uL MTT solution (5mg/ml), and the cells were incubated for 4 h at 37 °C. The cell layers were dissolved with 150 uL DMSO after the supernatants were removed. The optical density of each well was measured at 490 nm using a Model 680 Microplate Reader (Bio-Rad, USA).

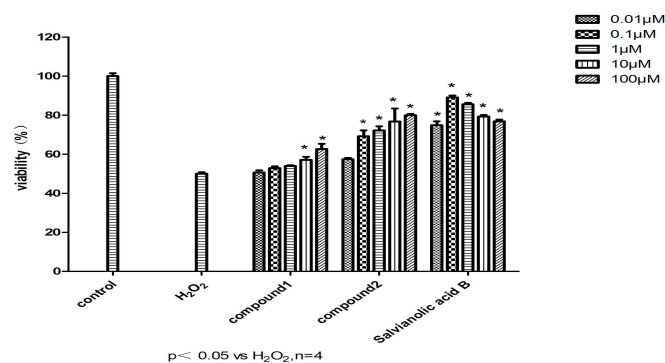

### Protective effects on H<sub>2</sub>O<sub>2</sub>-induced myocardial injury of compounds 1 and 2.

### References:

- (1) Lu, Y.; Zhang, Y.; Wang, N.; Pan, Z.; Gao, X.; Zhang, F.; Shan, H.; Luo, X.; Bai, Y.; Sun, L.; Song, W.; Xu, C.; Wang, Z.; Yang, B. *Circulation*. **2010**, *122*, 2378-2387.
- (2) Lu, Y.; Zhang, Y.; Shan, H.; Pan, Z.; Li, X.; Li, B.; Xu, C.; Zhang, B.; Zhang, F.; Dong, D.; Song, W.; Qiao, G.; Yang, B. *Cardiovasc Res* **2009**, *84*, 434-441.
